# Supplementary material for: Deficits in Mitochondrial Spare Respiratory Capacity Contribute to the Neuropsychological Changes of Alzheimer’s Disease
Source: J Pers Med. 2020 Apr 29;10(2):32. doi: 10.3390/jpm10020032 (PMC7354560; doi:10.3390/jpm10020032)

Native-space 3D  
T1-weighted image

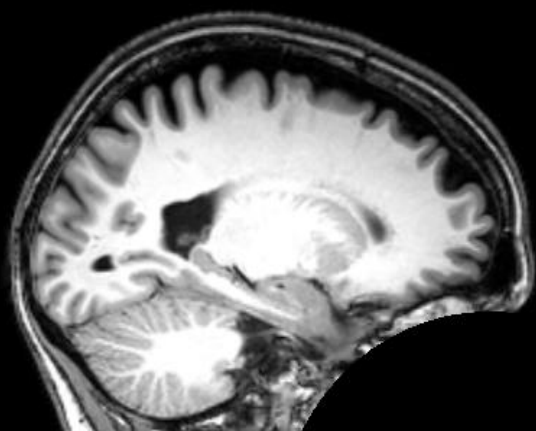

Hippocampal contour superimposed  
to native-space T1-weighted image

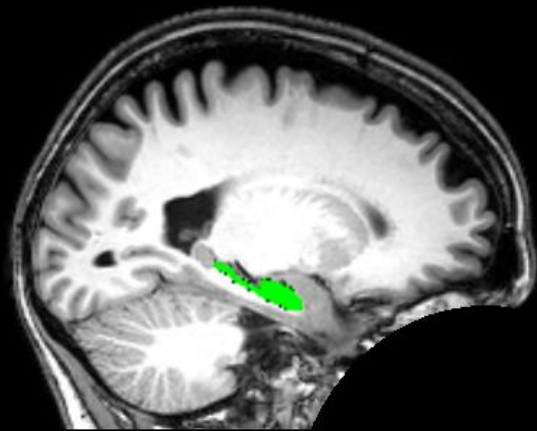

Hippocampal contour superimposed to  
native-space segmented map of grey matter

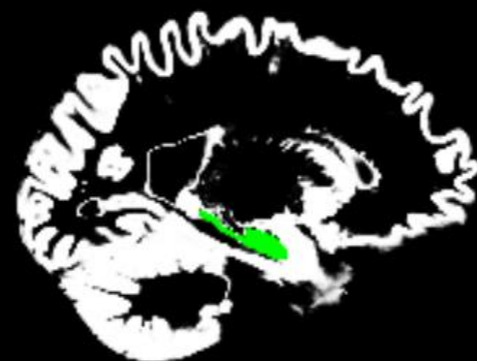

Native-space  
hippocampus

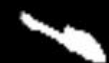

L

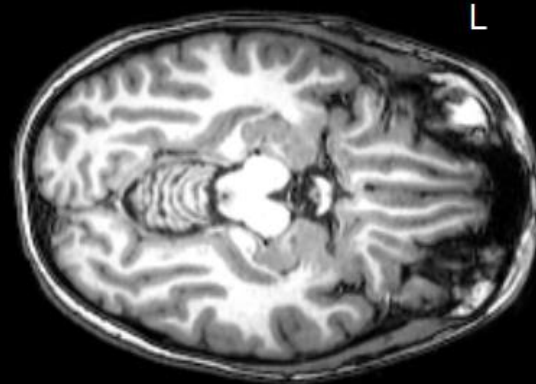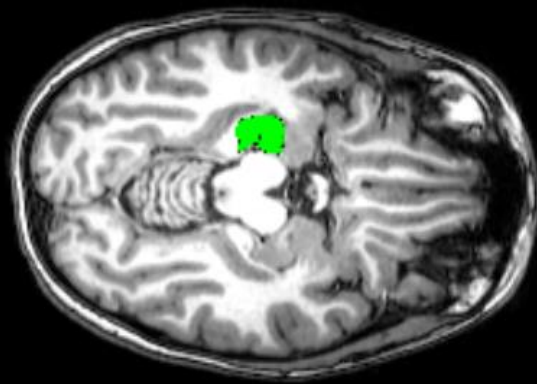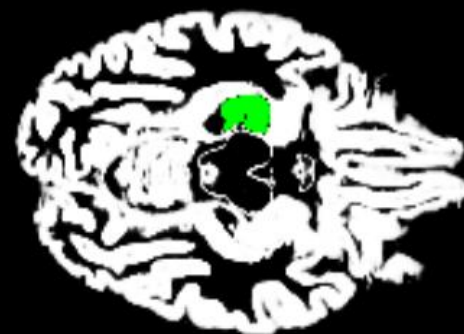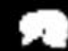

Supplement: Supplementary file 1 [file jpm-10-00032-s001.pdf]
